# Supplementary material for: Sphere-forming assay vs. organoid culture: Determining long-term stemness and the chemoresistant capacity of primary colorectal cancer cells
Source: PubMed Central journal article supplement — Int J Oncol. 2019 Jan 11;54(3):893–904. doi: 10.3892/ijo.2019.4683 (PMC6365025; doi:10.3892/ijo.2019.4683), 2019-01-11
Supplement: Supplementary_Data.pdf [file Supplementary_Data.pdf]

Table SI. Clinical characteristics of patients with colorectal cancer with quantifications of organoids, spheres and PDXs forming efficiency derived from corresponding primary adenocarcinoma specimens.

| Case no. | Age, years | Sex | Tumor location | Pathological TNM stage | Differentiation level | Dukes' stage | Organoid-forming efficiency (%) | Sphere-forming efficiency (%) | PDX counterpart |
|----------|------------|-----|----------------|------------------------|-----------------------|--------------|---------------------------------|-------------------------------|-----------------|
| CRC1     | 58         | F   | R              | T3N2bM1                | Low                   | D            | 10.33±2.08                      | 5±3.61                        | 2/4             |
| CRC2     | 43         | F   | R              | T4aN0M0                | Moderate              | B            | 34.33±3.51                      | 28±6.08                       | 1/4             |
| CRC3     | 66         | M   | R              | T3N1M0                 | Low                   | C            | 27.33±8.50                      | 0                             | 0/4             |
| CRC4     | 80         | F   | A              | T3N0M0                 | Moderate              | B            | 6.67±3.21                       | 0                             | 0/4             |
| CRC5     | 68         | M   | R              | T2N0M0                 | Moderate              | A            | 41.33±4.16                      | 25.67±3.21                    | 1/4             |
| CRC6     | 45         | M   | R              | T3N0M0                 | Moderate              | B            | 35.67±14.7                      | 22±3.61                       | 2/4             |
| CRC7     | 70         | M   | S              | T4aN0M1                | Moderate              | D            | 12.67±5.5                       | -                             | 0/4             |
| CRC8     | 69         | F   | R              | T2N0M0                 | High                  | A            | 16±3.61                         | 0                             | 0/4             |
| CRC9     | 58         | F   | R              | T2N0M0                 | High                  | A            | 20.33±0.58                      | 12.3±2.52                     | 0/4             |
| CRC10    | 53         | M   | R              | T3N0M0                 | Moderate              | B            | 10±4.36                         | 0                             | 0/4             |
| CRC11    | 68         | M   | R              | T3N0M0                 | Moderate              | B            | 20.33±0.58                      | -                             | 0/4             |
| CRC12    | 25         | M   | S              | T3N0M0                 | Moderate              | B            | 19±8.89                         | 0                             | 0/4             |
| CRC13    | 53         | F   | A              | T3N1M0                 | Moderate              | C            | 11.67±1.53                      | 0                             | 0/4             |

|       |    |   |       |                   |          |   |           |   |     |
|-------|----|---|-------|-------------------|----------|---|-----------|---|-----|
| CRC14 | 72 | F | A     | T4aNxM1           | Moderate | D | 4.33±3.51 | - | 0/4 |
| CRC15 | 60 | F | R     | T3NxM0            | Moderate | B | 1.33±0.58 | 0 | 0/4 |
| CRC16 | 59 | M | S     | T3N0M0            | Moderate | B | 0         | 0 | 0/4 |
| CRC17 | 46 | M | R     | T4NxM0            | Moderate | B | 0         | 0 | --  |
| CRC18 | 54 | M | A     | T3NxM0            | Moderate | C | 0         | - | --  |
| CRC19 | 48 | F | A     | T3N0M0            | Moderate | B | 0         | 0 | --  |
| CRC20 | 65 | M | R + S | T3N0M0+<br>T2N0M0 | Moderate | B | 0         | 0 | --  |

Sex: M, male; f, female. Location: R, rectum; A, ascending; S, sigmoid. Tumor specimens (n=20) were surgically obtained from colorectal cancer patients with adenocarcinoma and processed into single cell suspensions. To calculate forming efficiency of organoids or spheres, 1,000 single primary cells were then seeded in 3D culture conditions to generate organoids or spheres *in vitro*; following incubation for 7 days, organoids or spheres with diameters >100 µm were scored to detect forming efficiency (%). Data are presented as the means ± SD; the symbol - represents the contamination of samples. For the PDX model, 500,000 cells were mixed with 600 µl PBS/Matrigel mixture (1:1 volume). The cells were then subcutaneously injected into the flanks of NOD/SCID mice at dose of 125,000 cells/point, and the results of PDX generating were detected on day 30 post-implantation. To calculate the success rate of PDX generation, 40 mice in total were used, and 2 mice for each case (n=20) were used in generating PDXs. The cases with 1 or >1 xenograft generating were defined as success (n=4). The cases in which mice exhibited humane endpoints post-injection were excluded from the study and are indicated by the symbol -- (n=4). The humane endpoints included: Excessive weight loss, excessive emaciation and self induced trauma. The other cases were defined as failed (n=16). The final success rate of PDX generation is shown in Table I. For PDX establishment, the detailed information of mice excluded due to humane endpoints (assigned according to the corresponding patient number) is: one CRC17-Mouse at day 27, one CRC18-Mouse at day 21, one CRC19-Mouse at day 26, one CRC20-Mouse at day 25 post-implantation. The mice with humane endpoints were then anesthetized and sacrificed according to the AVMA guidelines.
